# Supplementary material
Source: PubMed Central journal article supplement (PMC4162802)
Supplement: supp_140266_excess-mallen-1-at.pdf [file supp_140266_excess-mallen-1-at.pdf]

**Appendix 1 (as supplied by the authors): Flowchart of participant selection**

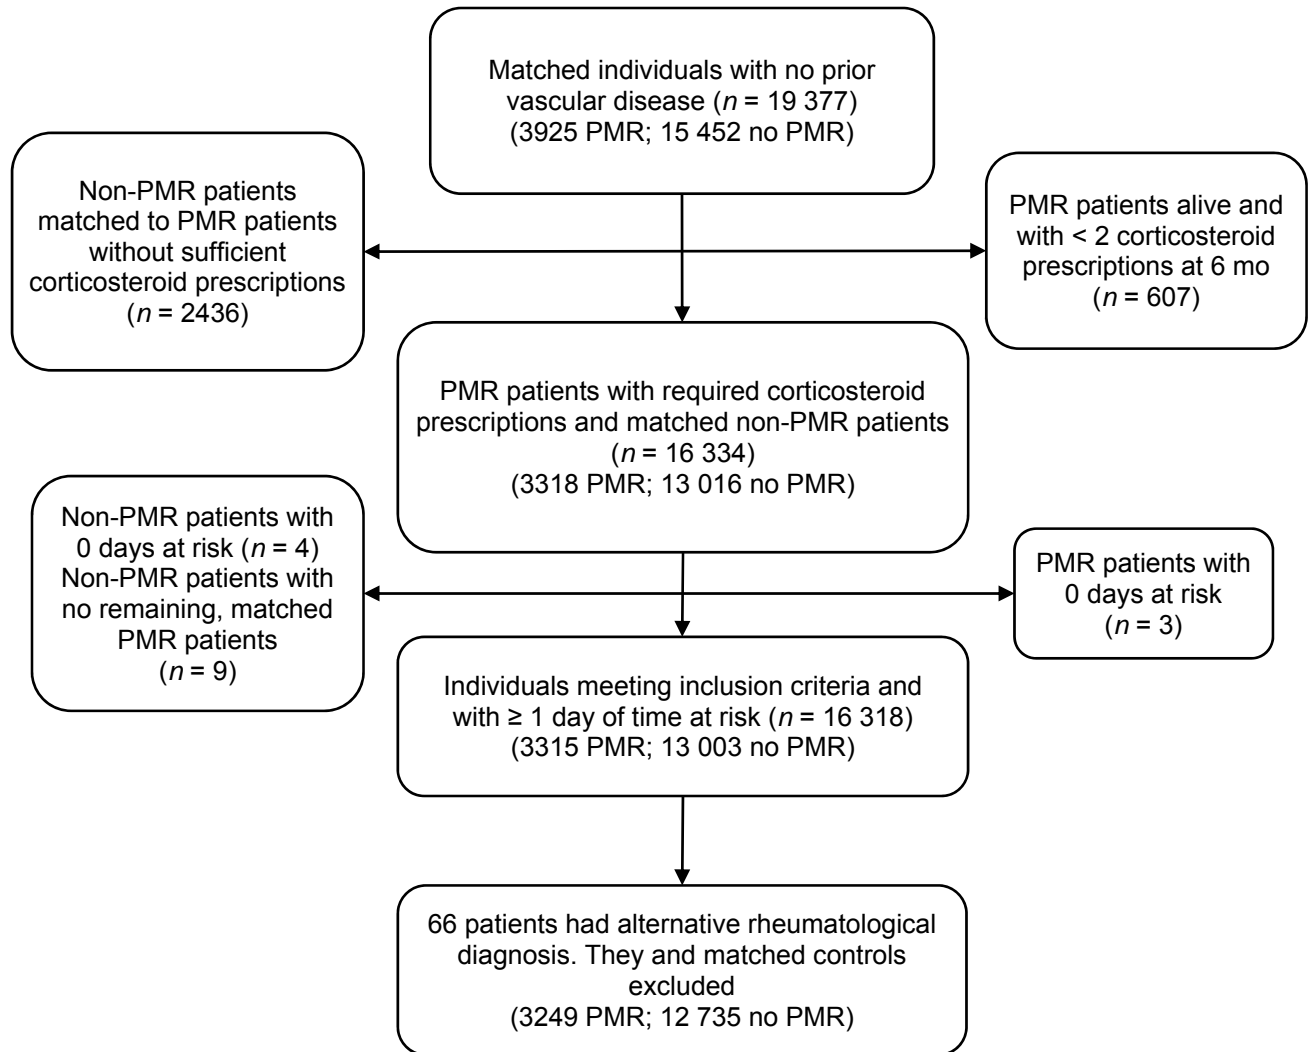

Note: PMR = polymyalgia rheumatica.
